# Supplementary material
Source: PubMed Central journal article supplement (PMC2940522)
Supplement: en.2010-0239_1.pdf [file en.2010-0239_1.pdf]

**Suppl Fig. 1 Assessment of *Prl* mRNA expression in guinea pig decidual tissues.** RT-PCR analysis for *Prl* mRNA in the pituitary gland and uterus of a cycling female guinea pig (NP) and in uterine decidual tissue on gestation d15 and d25. Note that *Prl* transcripts were not detected in d15 and d25 guinea pig decidua.

**Suppl Fig. 2 Immunocytochemical localization of PRL and GH in the guinea pig anterior pituitary.** **A)** Identification of PRL immunopositive cells within the anterior pituitary of the guinea pig using antibodies to porcine PRL. **B)** Demonstration of the specificity of the PRL immunoreactivity within the guinea pig anterior pituitary by competition with recombinant guinea pig PRL. **C)** Identification of GH immunopositive cells within the anterior pituitary of the guinea pig using antibodies to porcine GH. Immunoreactive cells were identified by incubation with TRITC conjugated secondary antibody. Tissues were counterstained with DAPI.

NP-Pituitary

NP-Uterus

d15 Decidua

d25 Decidua

*Prl*

18S

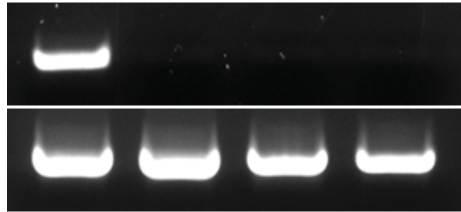

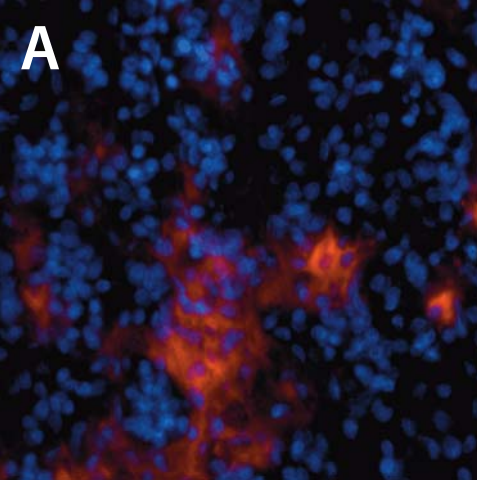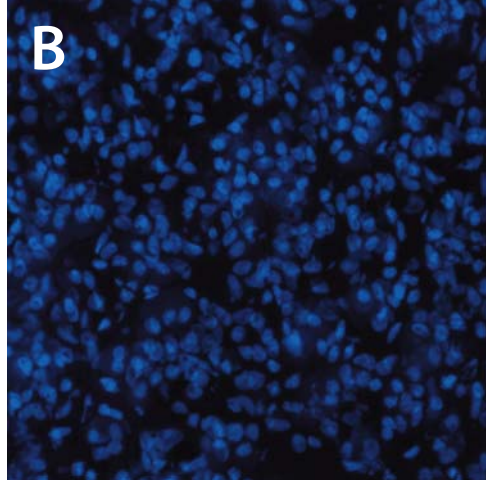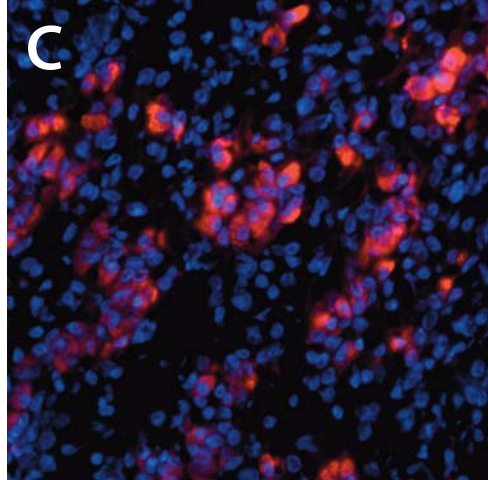

**Suppl Table 1. Guinea pig primer sequences.**

| <b>GENE</b>          | <b>FORWARD PRIMER</b>                                                                                                                                | <b>REVERSE PRIMER</b>                                                                                                                                                                   |
|----------------------|------------------------------------------------------------------------------------------------------------------------------------------------------|-----------------------------------------------------------------------------------------------------------------------------------------------------------------------------------------|
| <b><i>Prl</i></b>    | F1: 5'-CCATTACATCCACAGCCTCT-3'<br>F2: 5'-CTACTCTGTCTGGCTGGGAC-3'<br>F3: 5'-CATTTAAAGAATTCACAGCCCATGTGTCCCAGT-3'                                      | R1: 5'-GGAACCTTGAGATAATTGTCGA-3'<br>R2: 5'-CATGGCCTGGGTAAAAAACT-3'<br>R3: 5'-GGAGAGGCTGTGGATGTAAT-3'<br>R4: 5'-GGATCGCTTTTATACCCTTACA-3'<br>R5: 5'-GTTATATGTGGATCCTTAGCAGCTGCCATCATA 3' |
| <b><i>Prirp1</i></b> | F1: 5'-GCTTCCCAGTCCAAATGTATT3'<br>F2: 5'-GGCCTTCAAGACACAGACTAT-3'<br>F3: 5'-GATTTCAATTGATACTTTTCACCA-3'<br>F4: 5'-CATTTAAAGAATTCACAGTCCAAATGTATTG-3' | R1: 5'-GGTAAAAAGTATCAATGAAAT-3'<br>R2: 5'-GGAGGCTGTATGACAACCTT-3'<br>R3: 5'-GTGAGGACGTGGATATTGTCA-3'<br>R4: 5'-CATTTGGACTGGGAAGCTACA-3'<br>R5: 5'-GTTATATGTGGATCCTTAGTTGTGTCTATCA-3'    |
| <b><i>Prirp2</i></b> | F1: 5'-CCTGATACTGCTCATGTCAA-3'<br>F2: 5'-GTGGAAAATATTAGGAGAAGAA-3'<br>F3: 5'-GACTTCCATTCCTGAGATCAT-3'                                                | R1: 5'-CAGATGATCTCAGGAATGGAA-3'<br>R2: 5'-CCTTGAACAGCTCTGAAGAGA-3'<br>R3: 5'-GCTCGATCAAAAAGGTAAGGAA-3'<br>R4: 5'-CTTGACATGAGCAGTATCAGGA-3'                                              |
| <b><i>Gh</i></b>     | 5'-CAGTCCCGAAACCAGTCAG-3'                                                                                                                            | 5'-TATGATGCAGCTCAGTTTTA-3'                                                                                                                                                              |
| <b>18S</b>           | 5'-ATGCCAGAGTCTCGTTCGTT-3'                                                                                                                           | 5'-CGCGTTCTATTTTGTGGT-3'                                                                                                                                                                |

**Suppl Table 2. GH sequence analysis.**

| <b>Genus species</b>         | <b>Common Name</b>  | <b>Accession No.</b> | <b>Amino acids</b> | <b>Percent identity with <i>Cavia porcellus</i></b> |
|------------------------------|---------------------|----------------------|--------------------|-----------------------------------------------------|
| <i>Cavia porcellus</i>       | Guinea pig          | AAF36409             | 216                | 100                                                 |
| <i>Canis familiaris</i>      | Dog                 | NP_001003168         | 216                | 89                                                  |
| <i>Felis catus</i>           | Cat                 | NP_001009337         | 216                | 89                                                  |
| <i>Sus scrofa</i>            | Pig                 | NP_999034            | 217                | 87                                                  |
| <i>Equus caballus</i>        | Horse               | NP_001075417         | 216                | 87                                                  |
| <i>Mesocricetus auratus</i>  | Golden hamster      | AAB20368             | 216                | 87                                                  |
| <i>Bos taurus</i>            | Cow                 | NP_851339            | 217                | 86                                                  |
| <i>Rattus norvegicus</i>     | Rat                 | NP_001030020         | 216                | 85                                                  |
| <i>Ovis aries</i>            | Sheep               | NP_001009315         | 217                | 84                                                  |
| <i>Mus musculus</i>          | Mouse               | NP_032143            | 216                | 84                                                  |
| <i>Monodelphis domestica</i> | Opossum             | NP_001028165         | 215                | 79                                                  |
| <i>Gallus gallus</i>         | Chicken             | NP_989690            | 216                | 71                                                  |
| <i>Macaca mullata</i>        | Rhesus monkey       | NP_000506            | 217                | 66                                                  |
| <i>Homo sapiens</i>          | Human               | NP_001036203         | 217                | 65                                                  |
| <i>Xenopus laevis</i>        | African clawed frog | NP_001083848         | 214                | 59                                                  |
